# Supplementary material for: Genome Sequences Reveal Cryptic Speciation in the Human Pathogen Histoplasma capsulatum
Source: PubMed Central journal article supplement (PMC5717386; doi:10.1128/mbio.01339-17), 2017-12-05
Supplement: mbo006173597sf1.pdf [file mbo006173597sf1.pdf]

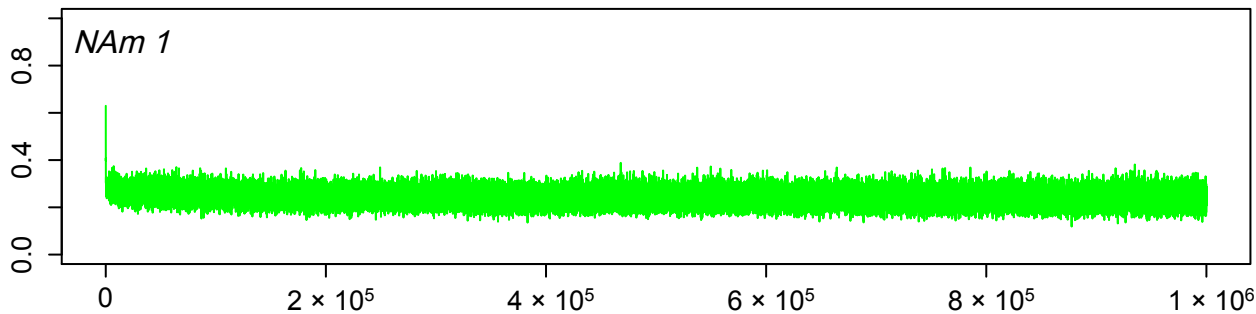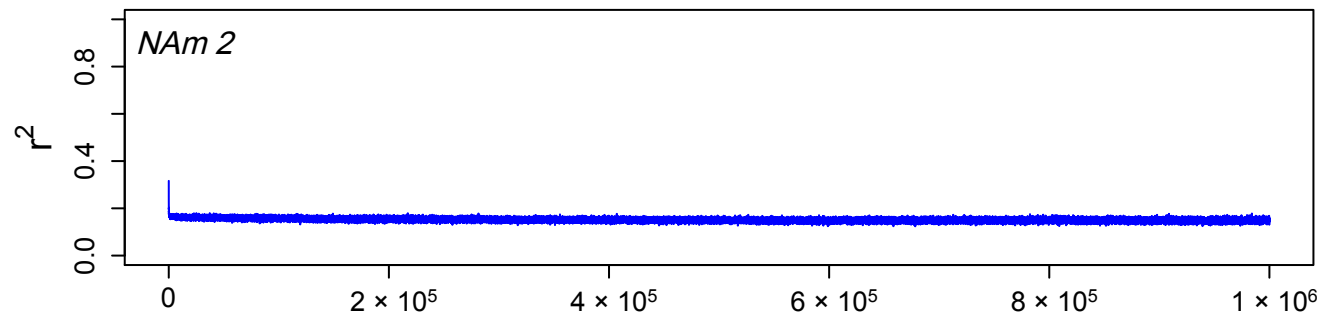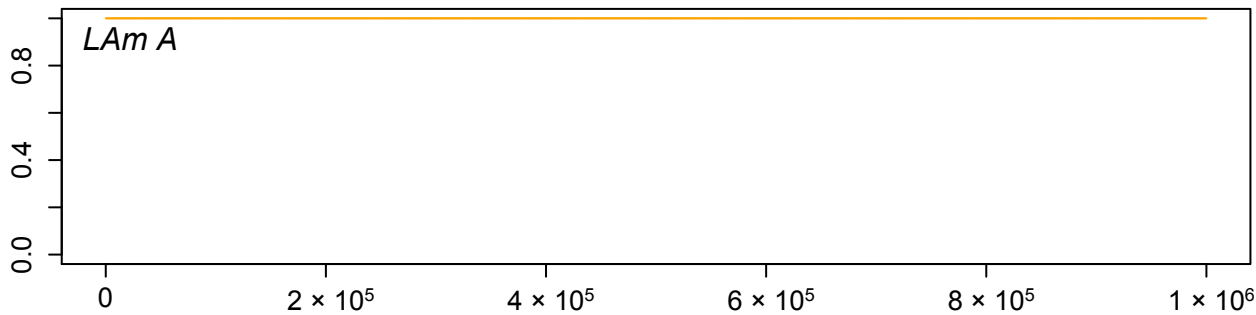

Physical distance (bp)
