# Supplementary material for: Genome Sequences Reveal Cryptic Speciation in the Human Pathogen Histoplasma capsulatum
Source: PubMed Central journal article supplement (PMC5717386; doi:10.1128/mbio.01339-17), 2017-12-05

**A.  $N_e = 10^6$** 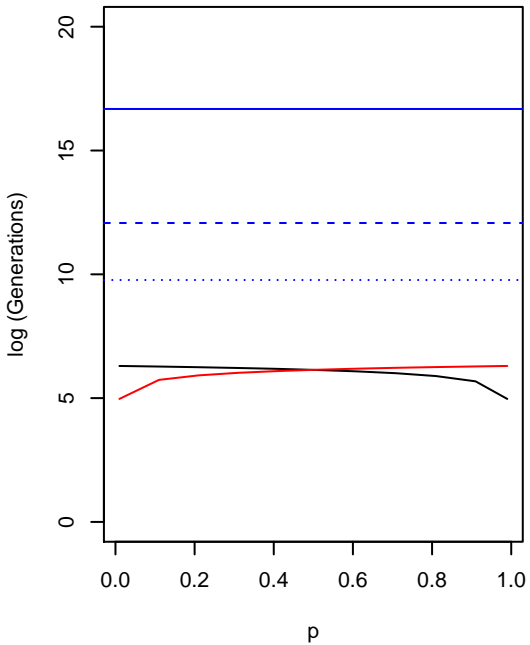**B.  $N_e = 10^5$** 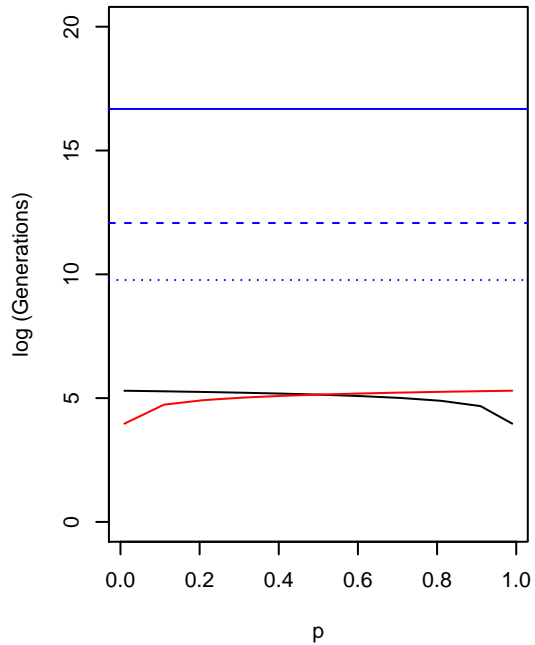**C.  $N_e = 10^4$** 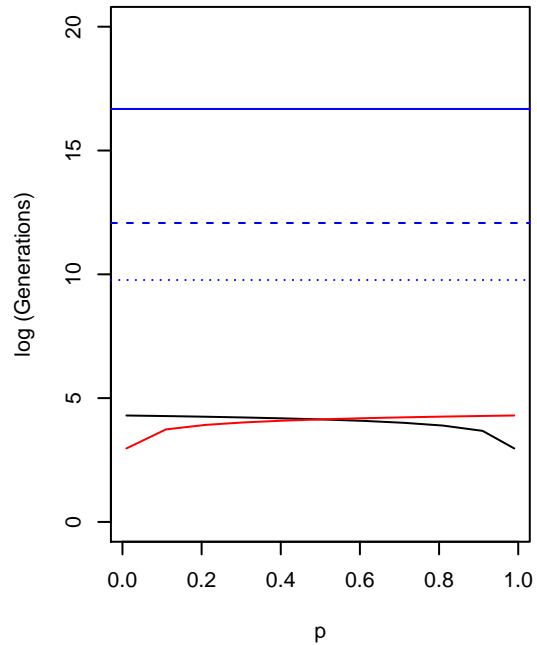

Supplement: mbo006173597sf2.pdf [file mbo006173597sf2.pdf]
